# Supplementary material for: A novel strategy for extracted ion chromatogram extraction to improve peak detection in UPLC-HRMS
Source: Royal Society of Chemistry journal article supplement (doi:10.1039/c8ay01850b), 2018-01-01
Supplement: c8ay01850b1.pdf [file c8ay01850b1.pdf]

1 Supporting Information

2

3 **A Novel Strategy for Extracted Ion Chromatogram Extraction to**  
4 **Improve Peak Detection in UPLC–HRMS**

5 Peng Lu<sup>a</sup>, Mei-Juan Fan<sup>a</sup>, Qian Zhang<sup>b,e</sup>, Qing-Xia Zheng<sup>a</sup>, Ping-Ping Liu<sup>a</sup>, Bing Wang<sup>a</sup>, Jun-  
6 Wei Guo<sup>a</sup>, Sheng Wang<sup>a,\*</sup>, Hai-Yan Fu<sup>c</sup>, Yong-Jie Yu<sup>a,b,e,\*</sup>, Yuanbin She<sup>d</sup>

7

8 <sup>a</sup> Zhengzhou Tobacco Research Institute of CNTC, Zhengzhou 450001, China

9 <sup>b</sup> College of Pharmacy, Ningxia Medical University, Yinchuan 750004, China

10 <sup>c</sup> School of Pharmaceutical Sciences, South Central University for Nationalities, Wuhan

11 430074, China

12 <sup>d</sup> Zhejiang University of Technology, Hangzhou 310014, China

13 <sup>e</sup> Ningxia Engineering and Technology Research Center for Modernization of Hui Medicine,

14 Ningxia Medical University, Yinchuan 750004, China

15

16 \* Corresponding author.

17 E-mail: [yongjie.yu@163.com](mailto:yongjie.yu@163.com); [wangs@ztri.com.cn](mailto:wangs@ztri.com.cn)

18

19

## 20 **1. Experimental Part.**

### 21 **Dataset 1.**

22 *Sample treatment for tobacco plant and tea samples.* Tobacco plant and tea samples are  
23 grounded to powder before analysis. About 20 mg sample was weighted in a 2.0 mL tube and  
24 added with 1.5 mL solvent of CH<sub>3</sub>OH and H<sub>2</sub>O (70/30, v/v). A 2 min volute, followed by a 30  
25 min ultra-sounded with 40 KHz treatment utilized for components extraction. The tube was  
26 centrifuged at 13000 rpm for 10 min, and 1 μL of supernatant was injected into an Agilent  
27 1290-6540 UPLC-QTOF.

28 An ultra-performance Agilent C18 column was used for tobacco plant sample analysis.  
29 The mobile phase consists of (A) water and (B) ACN with 0.1% Formic acid. A flow of 0.2  
30 mL min<sup>-1</sup> was used. The phase (A) is started from 85% and reduces to 0% within 15 min and  
31 maintains for 5 min. QTOF parameters are: Gas temperature, 350 °C; gas flow, 12 L min<sup>-1</sup>;  
32 nebulizer, 40 psi; sheath gas temperature, 350 °C; sheath gas flow, 10 L min<sup>-1</sup>; Vcap, 3500 V;  
33 and mass range, 50–1000.

34 An ultra-performance Waters T3 column was used for tea sample analysis. The mobile  
35 phase is the same as tobacco plant sample. The mobile phase started with 100% A and then  
36 declined to 70% within 10min, to 10% within 15 min, followed by a decrement to 0% at 17  
37 min and held for 4 min. The QTOF parameters are the same as tobacco plant sample.

38

39 *Sample treatment for wine sample.* 100 μL wine sample are pooled with 900 μL solvent  
40 (CH<sub>3</sub>OH/H<sub>2</sub>O, 70/30, v/v). 1 μL sample was injected into the Agilent 1290-6545 UPLC-  
41 QTOF with C18 column. Instrumental condition is the same as tobacco plant sample.

42

### 43 **Dataset 2.**

44 *Calibration samples.* Nineteen compounds, including *Metformin hydrochloride*, *Phenformin*  
45 *hydrochloride*, *Telmisartan*, *Clonidine hydrochloride*, *Atenolol*, *Metoprolol*, *Tolbutamide*,

46 *Lovastatin, Simvastatin, Gliclazide, Felodipine, Rosiglitazone maleate, Prazosin*  
47 *Hydrochloride, Candesartan, Cilxetil, Gliquidone, Reserpine, and Nifedipine* were prepared  
48 in methanol. Calibration samples were obtained by diluting the mixture with CH<sub>3</sub>OH.  
49 Concentrations for each compound are 8, 12, 16, 20, 24, and 28 ng mL<sup>-1</sup>. These calibration  
50 samples were analyzed on an Agilent 1290-6545 UPLC-QTOF. The instrumental parameters  
51 are the same as tobacco plant sample.

52

53 **Tea mixture samples.** The standard compound solutions were mixture with tea extraction (see  
54 tea sample treatment) to test quantification capability of AiCN-EIC for analyzing complex  
55 samples. Concentrations in these samples are the same as calibration samples. Tea mixture  
56 samples were analyzed on an Agilent 1290-6545 UPLC-QTOF with instrumental parameters  
57 optimized the same as tobacco plant sample.

58

## 59 **2. Data Analysis Part**

60 **Data analysis parameters for XCMS Online, Mzmine2/ADAP, and MS-DIAL.** The  
61 following parameters were used for these methods:

| <b>Method</b> | <b>Parameters</b>                                                                                                                                                                                                                                                                                                   |
|---------------|---------------------------------------------------------------------------------------------------------------------------------------------------------------------------------------------------------------------------------------------------------------------------------------------------------------------|
| XCMS Online   | Using parameters that have been optimized for UPLC-QTOF on the web version.                                                                                                                                                                                                                                         |
| Mzmine2/ADAP  | <b>Ion chromatogram extraction.</b> <i>ADAP Chromatogram Builder; m/z tolerance: 0.01 Da or 20 ppm.</i><br><b>Peak Detection.</b> <i>Peak deconvolution: wavelets (ADAP); Min highest intensity: 100.</i><br><b>Peak Alignment.</b> <i>method: RANSAC; m/z tolerance: 0.01 Da or 20 ppm; RT tolerance: 0.5 min.</i> |
| MS-DIAL       | <b>Data Collection.</b> <i>Centroid parameter: MS1 tolerance 0.01 Da.</i><br><b>Peak Detection.</b> <i>Mass slice width: 0.1 Da;</i><br><b>Peak Alignment.</b> <i>Retention time tolerance: 0.5 min; MS1 tolerance: 0.01 Da.</i>                                                                                    |

62

| Circle 1                            |      |          |        |        |                   |       |         |
|-------------------------------------|------|----------|--------|--------|-------------------|-------|---------|
| Step 0                              |      |          |        |        |                   |       |         |
|                                     | scan | m/z      | Bleft  | Bright | min(Bleft,Bright) | side  | cluster |
| 1                                   | 1    | 100.001  | Inf    | 0.001  | 0.001             | right | 0       |
| 2                                   | 5    | 100.002  | 0.001  | 0.0015 | 0.001             | left  | 0       |
| 3                                   | 2    | 100.0035 | 0.0015 | 0.0005 | 0.0005            | right | 0       |
| 4                                   | 6    | 100.004  | 0.0005 | 0.0015 | 0.0005            | left  | 0       |
| 5                                   | 3    | 100.0055 | 0.0015 | 0.0005 | 0.0005            | right | 0       |
| 6                                   | 7    | 100.006  | 0.0005 | 0.001  | 0.0005            | left  | 0       |
| 7                                   | 4    | 100.007  | 0.001  | 0.001  | 0.001             | left  | 0       |
| 8                                   | 8    | 100.008  | 0.001  | Inf    | 0.001             | left  | 0       |
| i=1                                 |      |          |        |        |                   |       |         |
|                                     | scan | m/z      | Bleft  | Bright | min(Bleft,Bright) | side  | cluster |
| 1                                   | 1    | 100.001  | Inf    | Inf    | 0                 |       | 1       |
| 2                                   | 5    | 100.002  | Inf    | 0.0015 | 0.0015            | right | 1       |
| 3                                   | 2    | 100.0035 | 0.0015 | 0.0005 | 0.0005            | right | 0       |
| 4                                   | 6    | 100.004  | 0.0005 | 0.0015 | 0.0005            | left  | 0       |
| 5                                   | 3    | 100.0055 | 0.0015 | 0.0005 | 0.0005            | right | 0       |
| 6                                   | 7    | 100.006  | 0.0005 | 0.001  | 0.0005            | left  | 0       |
| 7                                   | 4    | 100.007  | 0.001  | 0.001  | 0.001             | left  | 0       |
| 8                                   | 8    | 100.008  | 0.001  | Inf    | 0.001             | left  | 0       |
| <i>When i=2, no merge! continue</i> |      |          |        |        |                   |       |         |
| i=3                                 |      |          |        |        |                   |       |         |
|                                     | scan | m/z      | Bleft  | Bright | min(Bleft,Bright) | side  | cluster |
| 1                                   | 1    | 100.001  | Inf    | Inf    | 0                 |       | 1       |
| 2                                   | 5    | 100.002  | Inf    | 0.0015 | 0.0015            | right | 1       |
| 3                                   | 2    | 100.0035 | 0.0015 | Inf    | 0.0015            | left  | 2       |
| 4                                   | 6    | 100.004  | Inf    | 0.0015 | 0.0015            | left  | 2       |
| 5                                   | 3    | 100.0055 | 0.0015 | 0.0005 | 0.0005            | right | 0       |
| 6                                   | 7    | 100.006  | 0.0005 | 0.001  | 0.0005            | left  | 0       |
| 7                                   | 4    | 100.007  | 0.001  | 0.001  | 0.001             | left  | 0       |
| 8                                   | 8    | 100.008  | 0.001  | Inf    | 0.001             | left  | 0       |
| <i>When i=4, no merge! continue</i> |      |          |        |        |                   |       |         |
| i=5                                 |      |          |        |        |                   |       |         |
|                                     | scan | m/z      | Bleft  | Bright | min(Bleft,Bright) | side  | cluster |
| 1                                   | 1    | 100.001  | Inf    | Inf    | 0                 | right | 1       |
| 2                                   | 5    | 100.002  | Inf    | 0.0015 | 0.0015            | right | 1       |
| 3                                   | 2    | 100.0035 | 0.0015 | Inf    | 0.0015            | left  | 2       |
| 4                                   | 6    | 100.004  | Inf    | 0.0015 | 0.0015            | left  | 2       |
| 5                                   | 3    | 100.0055 | 0.0015 | Inf    | 0.0015            | right | 3       |
| 6                                   | 7    | 100.006  | Inf    | 0.001  | 0.001             | right | 3       |
| 7                                   | 4    | 100.007  | 0.001  | 0.001  | 0.001             | left  | 0       |
| 8                                   | 8    | 100.008  | 0.001  | Inf    | 0.001             | left  | 0       |
| i=6                                 |      |          |        |        |                   |       |         |
|                                     | scan | m/z      | Bleft  | Bright | min(Bleft,Bright) | side  | cluster |
| 1                                   | 1    | 100.001  | Inf    | Inf    | 0                 | right | 1       |
| 2                                   | 5    | 100.002  | Inf    | 0.0015 | 0.0015            | right | 1       |
| 3                                   | 2    | 100.0035 | 0.0015 | Inf    | 0.0015            | left  | 2       |
| 4                                   | 6    | 100.004  | Inf    | 0.0015 | 0.0015            | left  | 2       |
| 5                                   | 3    | 100.0055 | 0.0015 | Inf    | 0.0015            | right | 3       |
| 6                                   | 7    | 100.006  | Inf    | Inf    | 0                 |       | 3       |
| 7                                   | 4    | 100.007  | Inf    | 0.001  | 0.001             | right | 3       |
| 8                                   | 8    | 100.008  | 0.001  | Inf    | 0.001             | left  | 0       |
| i=7                                 |      |          |        |        |                   |       |         |
|                                     | scan | m/z      | Bleft  | Bright | min(Bleft,Bright) | side  | cluster |
| 1                                   | 1    | 100.001  | Inf    | Inf    | 0                 | right | 1       |
| 2                                   | 5    | 100.002  | Inf    | 0.0015 | 0.0015            | right | 1       |
| 3                                   | 2    | 100.0035 | 0.0015 | Inf    | 0.0015            | left  | 2       |
| 4                                   | 6    | 100.004  | Inf    | 0.0015 | 0.0015            | left  | 2       |
| 5                                   | 3    | 100.0055 | 0.0015 | Inf    | 0.0015            | left  | 3       |
| 6                                   | 7    | 100.006  | Inf    | Inf    | 0                 |       | 3       |
| 7                                   | 4    | 100.007  | Inf    | Inf    | 0                 |       | 3       |
| 8                                   | 8    | 100.008  | Inf    | Inf    | 0                 | left  | 3       |

| Circle 2                            |      |         |        |                    |        |         |   |
|-------------------------------------|------|---------|--------|--------------------|--------|---------|---|
| i=1                                 |      |         |        |                    |        |         |   |
|                                     | scan | m/z     | Bleft  | Bright :ft,Bright) | side   | cluster |   |
| 1                                   | 1    | 100.001 | Inf    | Inf                | 0      | right   | 1 |
| 2                                   | 5    | 100.002 | Inf    | Inf                | 0      |         | 1 |
| 3                                   | 2    | 100.004 | Inf    | Inf                | 0      |         | 1 |
| 4                                   | 6    | 100.004 | Inf    | 0.0015             | 0.0015 | right   | 1 |
| 5                                   | 3    | 100.006 | 0.0015 | Inf                | 0.0015 | left    | 3 |
| 6                                   | 7    | 100.006 | Inf    | Inf                | 0      |         | 3 |
| 7                                   | 4    | 100.007 | Inf    | Inf                | 0      |         | 3 |
| 8                                   | 8    | 100.008 | Inf    | Inf                | 0      | left    | 3 |
| <i>When i=2, no merge! continue</i> |      |         |        |                    |        |         |   |
| <i>When i=3, no merge! continue</i> |      |         |        |                    |        |         |   |
| i=4                                 |      |         |        |                    |        |         |   |
|                                     | scan | m/z     | Bleft  | Bright :ft,Bright) | side   | cluster |   |
| 1                                   | 1    | 100.001 | Inf    | Inf                | 0      | right   | 1 |
| 2                                   | 5    | 100.002 | Inf    | Inf                | 0      |         | 1 |
| 3                                   | 2    | 100.004 | Inf    | Inf                | 0      |         | 1 |
| 4                                   | 6    | 100.004 | Inf    | Inf                | 0      |         | 1 |
| 5                                   | 3    | 100.006 | Inf    | Inf                | 0      |         | 1 |
| 6                                   | 7    | 100.006 | Inf    | Inf                | 0      |         | 1 |
| 7                                   | 4    | 100.007 | Inf    | Inf                | 0      |         | 1 |
| 8                                   | 8    | 100.008 | Inf    | Inf                | 0      | left    | 1 |
| <i>When i=5, no merge! continue</i> |      |         |        |                    |        |         |   |
| <i>When i=6, no merge! continue</i> |      |         |        |                    |        |         |   |
| <i>When i=7, no merge! continue</i> |      |         |        |                    |        |         |   |
| <i>When i=8, no merge! continue</i> |      |         |        |                    |        |         |   |
| <b>End</b>                          |      |         |        |                    |        |         |   |

63

64 **Figure S1.** Graphical illustration of the developed EIC construction algorithm. At first, ions  
 65 are sorted based on m/z values. The boundary of each ion is calculated to select matched *side*.

66 Two ions will be merged if the *side* of the  $i$ th is right and the  $i+1$ th is left. For the clustered  
67 ions, the matched *side* is recalculated.
